# Supplementary material
Source: PubMed Central journal article supplement (PMC4964273)
Supplement: NIHMS803581-supplement-supplemental_material.pdf [file NIHMS803581-supplement-supplemental_material.pdf]

## **Supplementary material**

***LiZIP3* is a cellular zinc transporter that mediates the tightly regulated import of zinc in *Leishmania infantum* parasites**

Table S1 – Primers used in qRT-PCR.

| <b>Primer</b> | <b>Sequence</b>         |
|---------------|-------------------------|
| <b>P1</b>     | CTGAACGGCAAGCTGACTGGTAT |
| <b>P2</b>     | TGTAGCCGAGAATGCCCTTCAT  |
| <b>P3</b>     | CTTCATCATTCTCGCTGCATCG  |
| <b>P4</b>     | ATCGCAAACAGAAACGCCCA    |
| <b>P5</b>     | ATATCACTGGAGCTTGCGCTGAT |
| <b>P6</b>     | AAGAGGGAGCATTGGGATGATG  |
| <b>P7</b>     | ATAAACACGAGCGACCGATTCC  |

P1/P2 and P3/P4 amplify a portion of *LiGAPDH* and *LiZIP3* mRNAs, respectively; P5/P6 amplify the end of the coding region of the *LiZIP3* mRNA and the beginning of the endogenous 3' untranslated region (UTR); P5/P7 amplify the end of the coding region of the *LiZIP3* mRNA and the beginning of the 3' UTR of the pXGLiZIP3 vector.

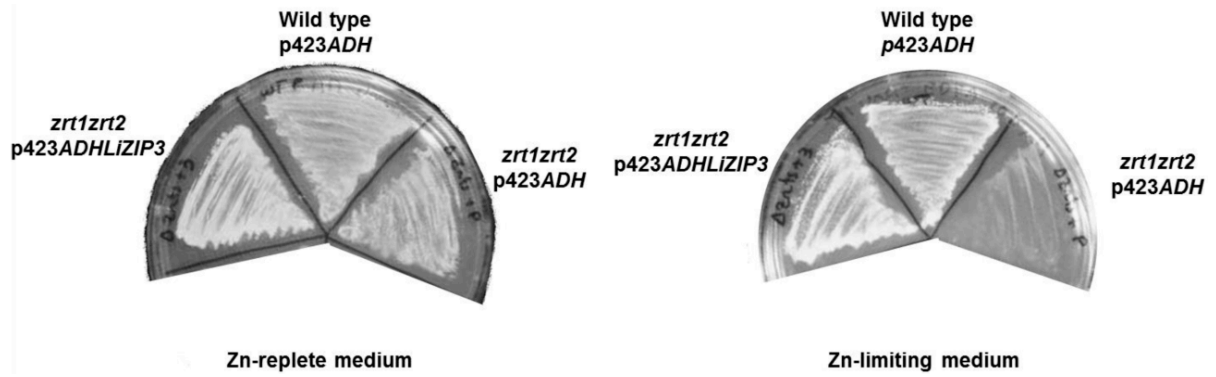

Fig. S1 – Expression of *LiZIP3* in the *zrt1zrt2* mutant strain, defective in high- and low-affinity zinc transport systems, rescues the growth defect phenotype in zinc-limiting medium. The yeast mutant strain *zrt1zrt2* (ZHY3), deficient in the high- and low-affinity zinc transport systems *ScZRT1* and *ScZRT2*, was transformed with the empty vector *p423ADH* or the vector containing the *LiZIP3* gene, *p423ADHLiZIP3*. The ability of *LiZIP3*-complemented yeast to grow in zinc-limiting medium was compared to that of the wild type strain (DY1457) and of the mutant strain carrying the empty vector. Mutant strains were able to grow in zinc-replete medium (SD-galactose); however, in zinc-limiting conditions (SD-galactose, 10  $\mu$ M EDTA), growth was only observed in the *LiZIP3*-complemented yeast.

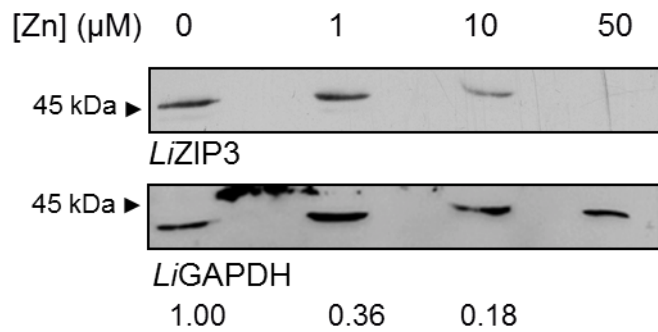

Fig. S2 – Dose-response expression of *LiZIP3* to the presence of zinc. Concentrations of zinc from 1 to 50  $\mu\text{M}$  were tested for their ability to decrease *LiZIP3* protein level 24 h upon metal supplementation. The numbers below the blots refer to the values obtained by densitometry analysis in which the intensity of the *LiZIP3* band in the presence of zinc was compared to the intensity in the absence of the metal, after correcting for the loading. Expression of *LiGAPDH* was used as loading control.

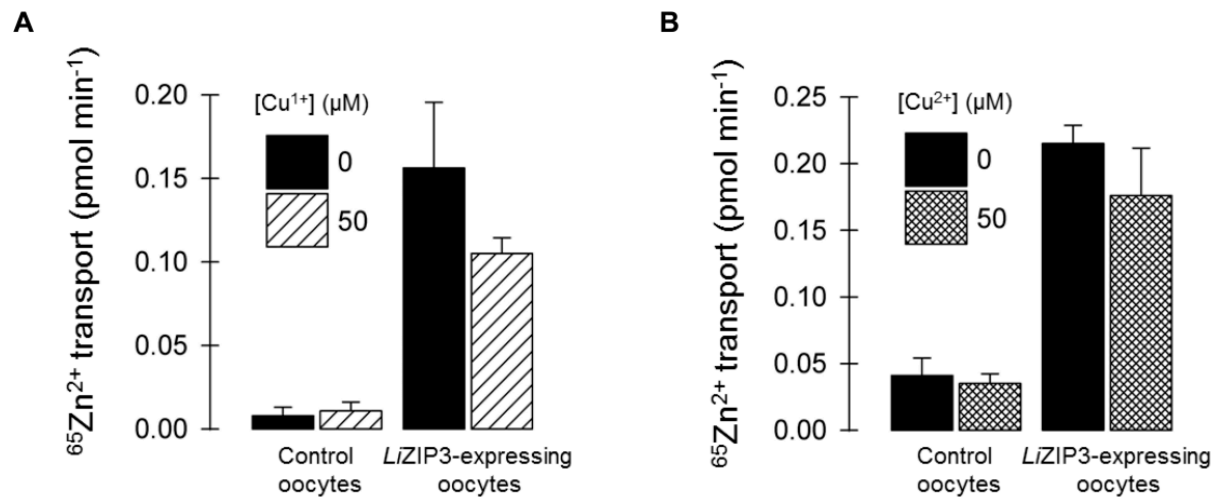

Fig. S3 – Effect of copper on *LiZIP3*-mediated zinc transport in *X. laevis* oocytes. The uptake of 5  $\mu\text{M}$   $^{65}\text{Zn}^{2+}$  was measured in control oocytes and oocytes expressing *LiZIP3* at pH 7.5 in the absence or presence of (A) 50  $\mu\text{M}$   $\text{Cu}^{1+}$  ( $n = 19\text{--}22$ ) or of (B) 50  $\mu\text{M}$   $\text{Cu}^{2+}$  ( $n = 12\text{--}14$ ) in the presence of 100  $\mu\text{M}$  *L*-histidine and, in (A) only, 100  $\mu\text{M}$  *L*-ascorbic acid. Two-way ANOVA revealed interactions (A,  $P < 0.001$  and B,  $P = 0.006$ ). Data in A and B were derived from independent preparations.

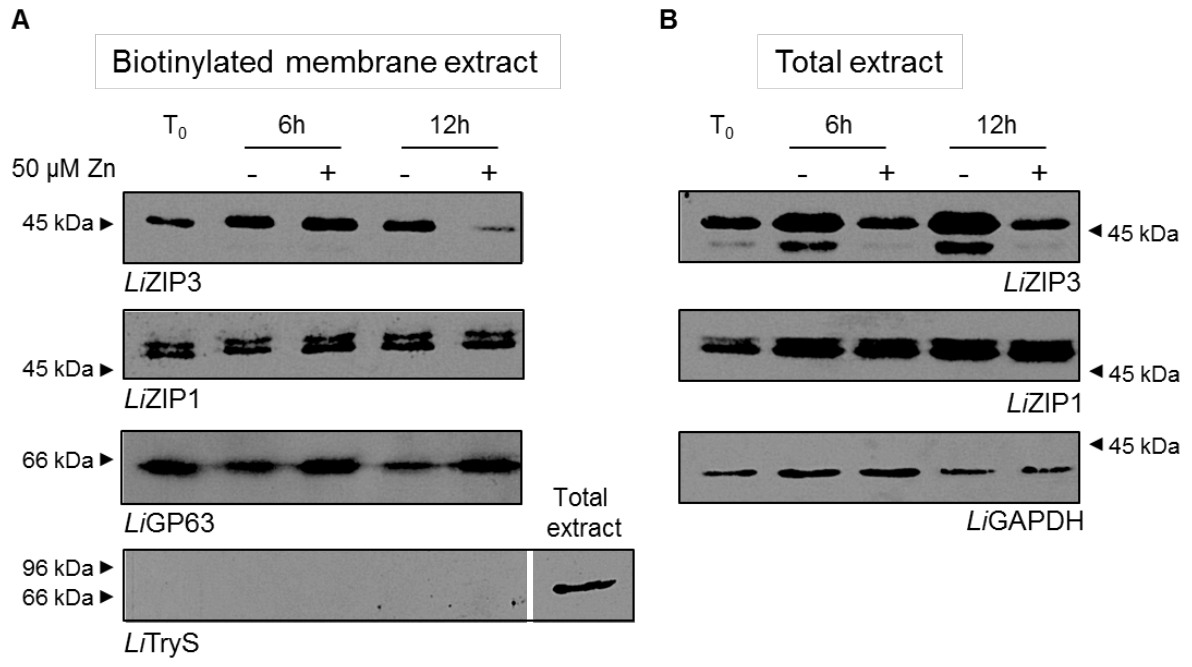

Fig. S4 – Original order of the samples run in blots of Fig. 6A and 6B.

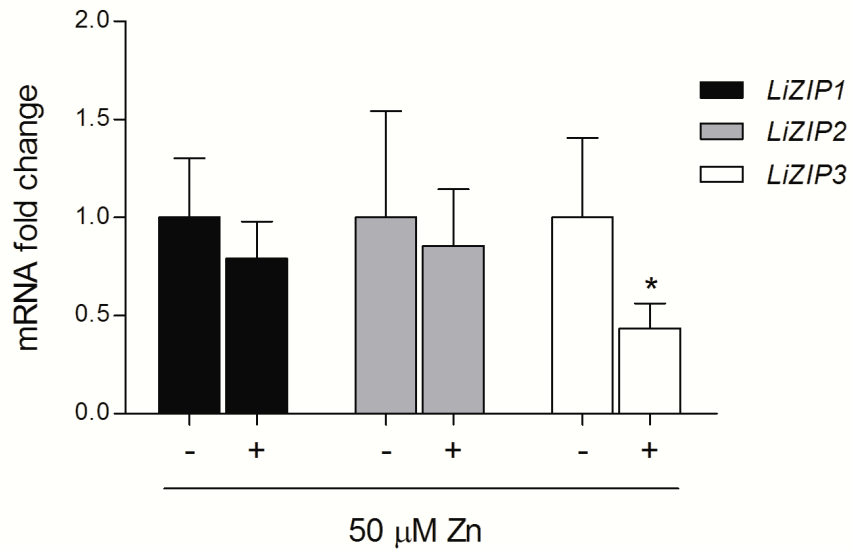

Fig. S5 - The effect of zinc on *LiZIP3* mRNA is specific to this transporter. Fifty micromolar zinc were added for 24 h to cultures of promastigotes grown for 48 h in normal medium. Changes in *LiZIP1*, *LiZIP2* and *LiZIP3* mRNA caused by zinc supplementation were measured by qRT-PCR (mean  $\pm$  SD,  $n = 4$ ; asterisks indicate significant differences between cultures not supplemented and supplemented with zinc, \*  $P < 0.05$ , Student's  $t$  test).

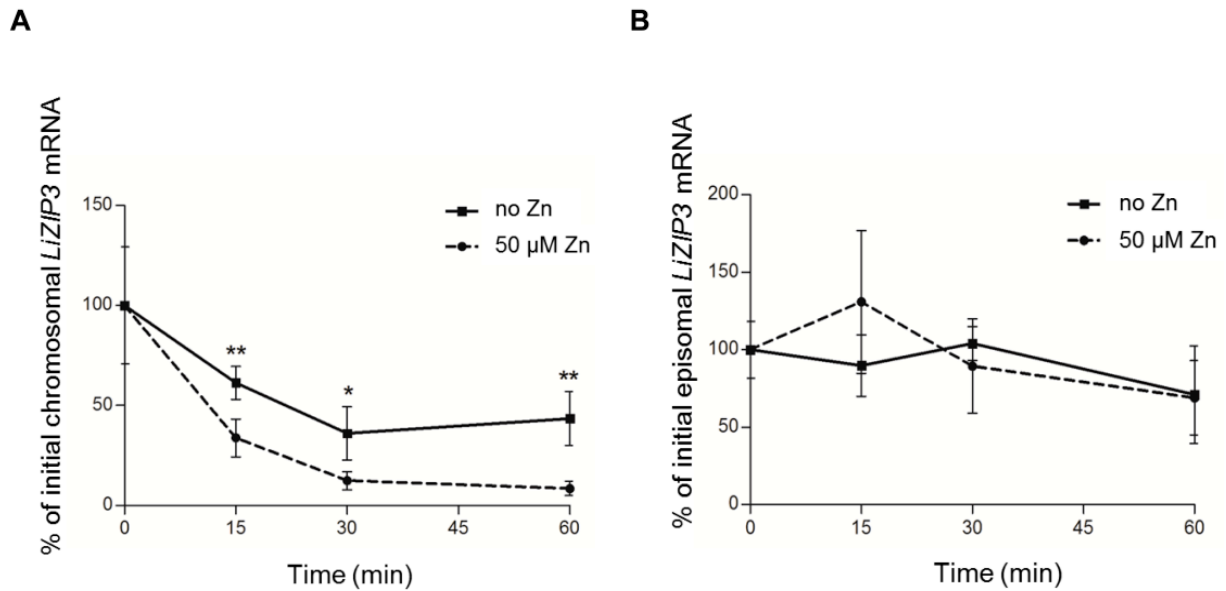

Fig. S6 – Zinc regulates *LiZIP3* mRNA stability through elements in the UTRs. Parasites carrying an extra-chromosomal copy of *LiZIP3* devoid of its own UTRs (pXGLiZIP3) were used to analyse the role of the endogenous UTRs in the regulation of *LiZIP3* mRNA by zinc. Fifty micromolar of zinc was added to a culture of pXGLiZIP3 parasites in the presence of 10  $\mu\text{g mL}^{-1}$  actinomycin D and the effect of the metal on the degradation of the *LiZIP3* mRNA derived from (A) the chromosome and (B) the episome was measured by qRT-PCR at several time-points (mean  $\pm$  SD,  $n = 3$ ; asterisks indicate significant differences in each time-point, \*  $P < 0.05$ , \*\*  $P < 0.01$ , Student's  $t$  test). The chromosome- and episome-derived *LiZIP3* transcripts were distinguished by using primer P5, complementary to the end of *LiZIP3*, in conjunction with the anti-sense primers P6 and P7, annealing to the beginning of the endogenous and episomal 3' UTRs, respectively.



## Supplementary experimental procedures

### *Construction of the p423ADHLiZIP3 plasmid*

To produce the p423ADHLiZIP3 construct, the *LiZIP3* open reading frame (ORF) was PCR-amplified from *L. infantum* genomic DNA using primers 5'-cggactagtATGGCGCAACCCACCCTC-3' and 5'-caccgctcgagCATCAGCCACTTCCCGATG-3' (clamp sequences in lower case and restriction sites underlined) and cloned into the *Hind*III and *Xho*I sites of pBluescript II KS+ (Stratagene). We verified the insertion of the cloned PCR product by DNA sequencing. *LiZIP3* was subsequently removed from pBluescript II KS+ by *Spe*I and *Xho*I restriction and cloned into p423ADH (Mumberg *et al.*, 1995).

### *Functional expression in the S. cerevisiae zrt1zrt2 strain*

The yeast strain *zrt1zrt2* (ZHY3, *MAT $\alpha$*  *ade6 can1 his3 leu2 trp1 ura3 zrt1::LEU2 zrt2::HIS3*) (Zhao and Eide, 1996b) was grown in SD-galactose medium supplemented with the required amino acids. Zinc-limiting medium was obtained by addition of 10  $\mu$ M EDTA.
